# Supplementary material
Source: PubMed Central journal article supplement (PMC2817954)

Supplemental Figure 2, Kerber et al.

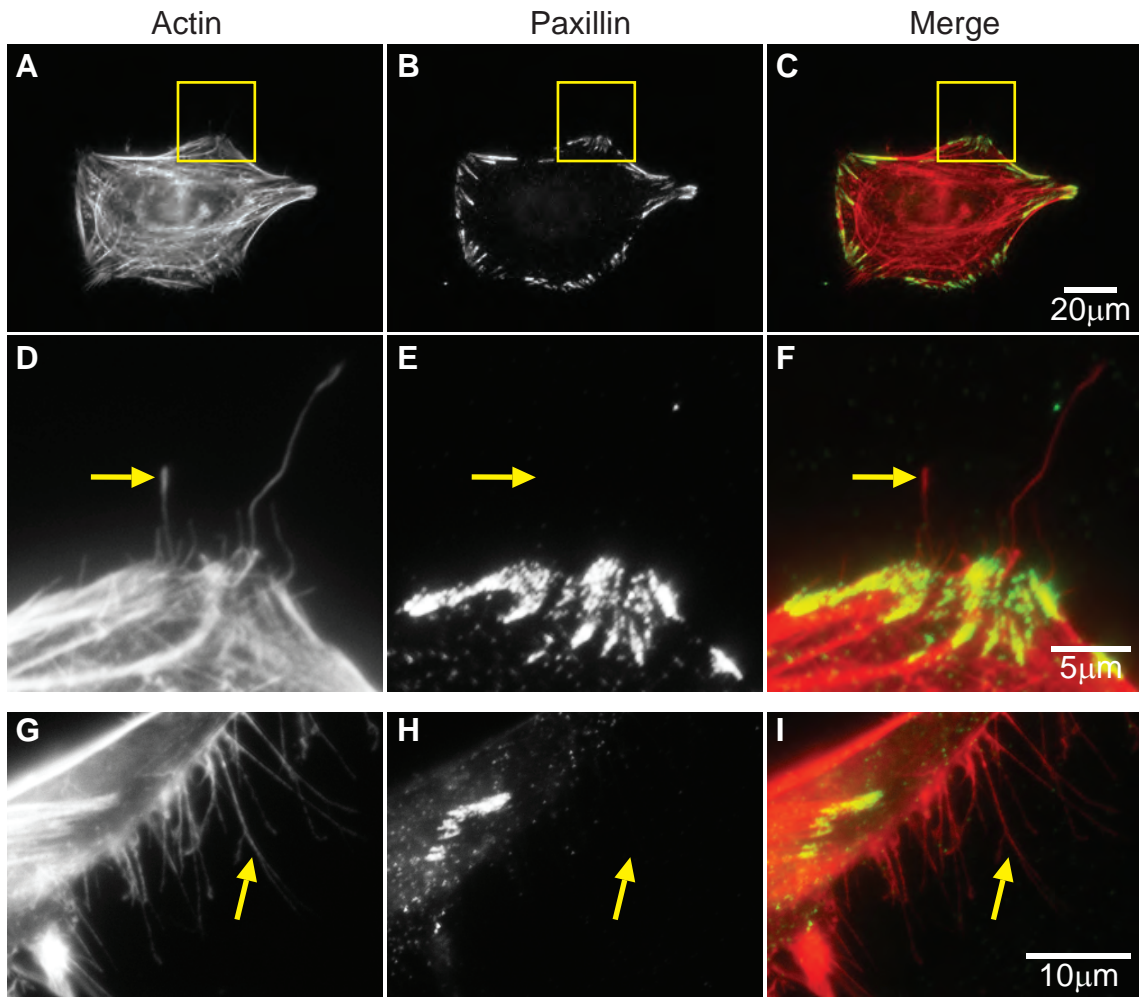

Fascin

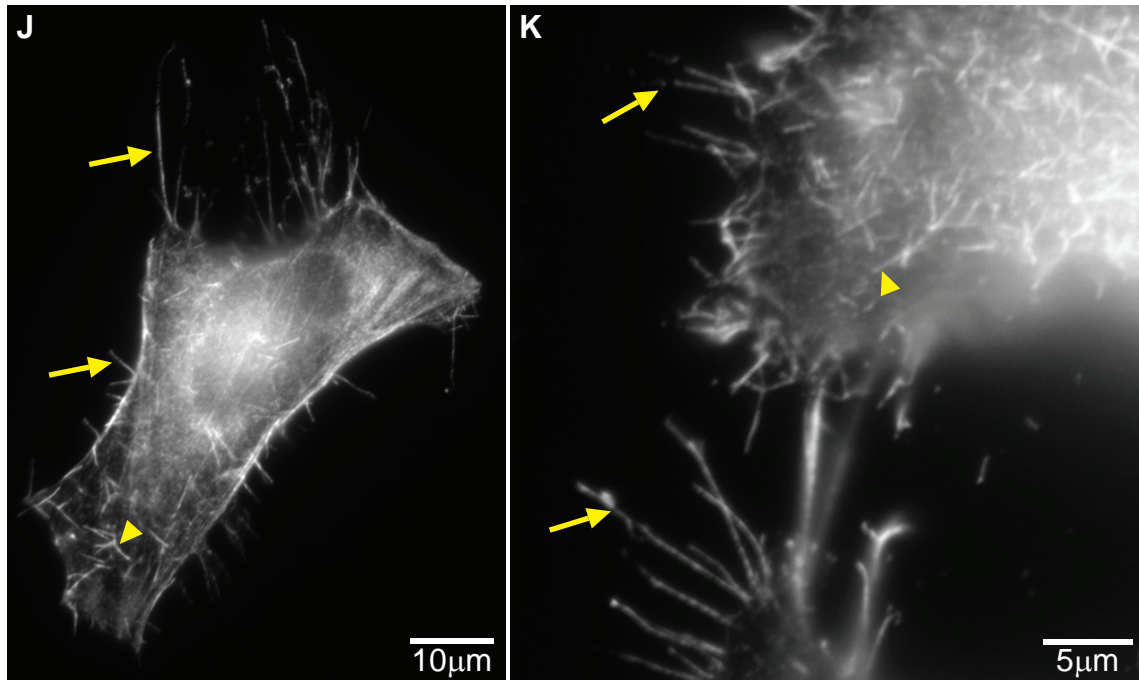

Supplement: NIHMS108752-supplement-2.pdf [file NIHMS108752-supplement-2.pdf]
